1 **TITLE: Early outcomes of tocilizumab in adults hospitalized with severe COVID-19 -**

2 **The Vall d’Hebron COVID-19 prospective cohort study.**

3 **TITLE: Early outcomes of tocilizumab in adults hospitalized with severe COVID-19 -**

4 **The Vall d’Hebron COVID-19 prospective cohort study.**

5

6 **Adrián Sánchez-Montalvá, MD, PhD,<sup>1,8,9</sup> Júlia Sellarés-Nadal, MD,<sup>1</sup> Juan Espinosa-**

7 **Pereiro, MD,<sup>1,8</sup> Nuria Fernández-Hidalgo, MD, PhD,<sup>1,10</sup> Santiago Pérez-Hoyos, PhD,<sup>2</sup>**

8 **Fernando Salvador, MD, PhD,<sup>1,8,9</sup> Xavier Durà, MD,<sup>1</sup> Marta Miarons, Pharm D,**

9 **PhD,<sup>3</sup> Andrés Antón, PhD,<sup>4,10</sup> Simeón Eremiev-Eremiev, MD,<sup>1</sup> Abiu Sempere-**

10 **González, MD,<sup>1</sup> Arnau Monforte-Pallarés, MD,<sup>1</sup> Pau Bosch-Nicolau, MD,<sup>1</sup> Salvador**

11 **Augustin, MD, PhD,<sup>5</sup> Júlia Sampol, MD,<sup>6</sup> Alfredo Guillén-del-Castillo, MD, PhD,<sup>7</sup>**

12 **Benito Almirante MD, PhD.<sup>1,10</sup>**

13 <sup>1</sup>Infectious Diseases Department, Vall d’Hebron University Hospital, Universitat

14 Autònoma de Barcelona, Barcelona, Spain;

15 <sup>2</sup>Statistic Unit, Vall d’Hebron Institute of Research, Barcelona, Spain;

16 <sup>3</sup>Pharmacy Department, Vall d’Hebron University Hospital, Universitat Autònoma de

17 Barcelona, Barcelona, Spain;

18 <sup>4</sup>Microbiology Department, Vall d’Hebron University Hospital, Universitat Autònoma de

19 Barcelona, Barcelona, Spain;

20 <sup>5</sup>Hepatology Department, Vall d’Hebron University Hospital, Universitat Autònoma de

21 Barcelona, Barcelona, Spain;

22 <sup>6</sup>Pneumology Department, Vall d’Hebron University Hospital, Universitat Autònoma de

23 Barcelona, Barcelona, Spain;

24 <sup>7</sup>Internal Medicine Department, Vall d'Hebron University Hospital, Universitat Autònoma  
25 de Barcelona, Barcelona, Spain;

26 <sup>8</sup>International Health Program of the Catalan Institut of Health (PROSICS), Barcelona,  
27 Spain;

28 <sup>9</sup>Tropical Medicine Spanish Research Network (RICET), Madrid, Spain;

29 <sup>10</sup>Infectious Diseases Spanish Research Network (REIPI), Madrid, Spain;

30

31 **Address correspondence to:**

32 Adrián Sánchez-Montalvá, MD, PhD (corresponding author)

33 Address: Passeig Vall d'Hebron, 119-129. Hospital Universitario Vall d'Hebron. Edificio  
34 General. Enfermedades Infecciosas. 6<sup>a</sup> planta. CP 08035. Barcelona. Spain.

35 e-mail: [adsanche@vhebron.net](mailto:adsanche@vhebron.net) . Telephone number: +34 93 274 6090 Fax number: +34 93  
36 489 40 91.

37 **Running title:** Tocilizumab in COVID19

38 **Word count (abstract):** 249

39 **Word count:** 3742

40 **Tables:** 7

41 **Figures:** 4

42 **Sources of funding:** none.

43 **Summary of the article's main point:** In patient with COVID-19 and lung injury, time  
44 from lung injury onset to tocilizumab administration may be critical to patient recovery.  
45 Early administration of host-directed therapies may improve patient outcome.

46 **ABSTRACT**

47 **Background:** Modulation of the immune system to prevent lung injury is being widely  
48 used against the new coronavirus disease (COVID-19) despite the scarcity of evidence.

49 **Methods:** We report the preliminary results from the Vall d’Hebron prospective cohort  
50 study at Vall d’Hebron University Hospital, in Barcelona (Spain), including all consecutive  
51 patients who had a confirmed infection with the severe acute respiratory syndrome  
52 coronavirus-2 (SARS-CoV-2) and who were treated with tocilizumab until March 25<sup>th</sup>. The  
53 primary endpoint was mortality at 7 days after tocilizumab administration. Secondary  
54 endpoints were admission to the intensive care unit, development of ARDS and respiratory  
55 insufficiency among others.

56 **Results:** 82 patients with COVID-19 received at least one dose of tocilizumab. The mean  
57 ( $\pm$  SD) age was 59.1 (19.8) years, 63% were male, 22% were of non-Spanish ancestry, and  
58 the median (IQR) age-adjusted Charlson index at baseline was 3 (1-4) points. Respiratory  
59 failure and ARDS developed in 62 (75.6%) and 45 (54.9%) patients, respectively. Median  
60 time from symptom onset to ARDS development was 8 (5-11) days. The median time from  
61 symptom onset to the first dose of tocilizumab was 9 (7-11) days. Mortality at 7 days was  
62 26.8%. Hazard ratio for mortality was 3.3; 95% CI, 1.3 to 8.5 (age-adjusted hazard ratio for  
63 mortality 2.1; 95% CI, 0.8 to 5.8) if tocilizumab was administered after the onset of ARDS.

64 **Conclusion:** Time from lung injury onset to tocilizumab administration may be critical to  
65 patient recovery. Our preliminary data could inform bedside decisions until more data from  
66 clinical trials becomes available.

67

68

69 **INTRODUCTION:**

70 Coronavirus disease 2019 (COVID-19) is a novel illness caused by severe acute respiratory  
71 syndrome coronavirus-2 (SARS-CoV-2). It was first reported in December 2019 in Hubei  
72 province, China.<sup>1</sup> Since then, SARS-CoV-2 has rapidly spread worldwide.  
73 According to the World Health Organization (WHO), as of July 8<sup>th</sup>, 2020, there have been  
74 11.669.259 laboratory-confirmed cases and 539.906 deaths.<sup>2</sup> The crude case fatality rate,  
75 estimated to be between 2.3% and 3.3%, is highly dependent on age and underlying  
76 conditions.<sup>3,4</sup> Death is mainly due to respiratory failure caused by an acute respiratory  
77 distress syndrome (ARDS). As the pathophysiology behind lung injury is progressively  
78 elucidated, several therapies have been proposed on the basis of pre-clinical studies and the  
79 previous experience with the severe acute respiratory syndrome coronavirus (SARS-CoV)  
80 and the Middle East Respiratory Syndrome Coronavirus (MERS-CoV).<sup>5,6</sup> Many of them  
81 are being used off-label in a desperate attempt to improve patient outcomes, including  
82 antiviral therapies, coagulation-modifying drugs and immune-modulating therapies.<sup>7-11</sup>  
83 In COVID-19, an excessive immune response inducing disproportionate release of  
84 cytokines and hyperinflammation has been proposed as a cause for the lung damage,  
85 mimicking a secondary haemophagocytic lymphohistiocytosis.<sup>12</sup> Host-directed therapies  
86 have immune-modulating properties with higher precision than steroids and other immune-  
87 modulating therapies.<sup>13</sup> Tocilizumab is a humanized monoclonal antibody that inhibits  
88 interleukin-6 (IL-6) receptor with a well-known safety profile and is approved for the  
89 treatment of rheumatoid arthritis and, since 2017, the treatment of chimeric antigen receptor  
90 (CAR) T cell-induced severe or life-threatening cytokine release syndrome (CRS).<sup>14,15</sup> It  
91 has been used with promising results in small retrospective cohort studies of SARS-CoV-2  
92 infected patients in China.<sup>9,16</sup> The efficacy of other host-directed therapies targeting

93 hyperinflammation is being assessed under randomized clinical trial conditions for severe  
94 SARS-CoV-2 infected patients.<sup>17,18</sup>  
95 However, a proper characterization of the subset of patients who will benefit most from  
96 host-directed therapy and defining the precise timing for host-directed therapies  
97 administration has not yet been performed and is critical to allocate limited drug stocks and  
98 reduce COVID-19 associated mortality. We aim to describe a prospective cohort of SARS-  
99 CoV-2 infected patients treated with tocilizumab and define risk factors associated with  
100 poor outcome.

## 101     **METHODS**

### 102     **Study setting and population**

103     The Vall d’Hebron COVID-19 Prospective Cohort Study includes all consecutive adult  
104     patients ( $\geq 18$  years old) treated for COVID-19 at Vall d’Hebron University Hospital, a  
105     1100-bed public tertiary care hospital in Barcelona, Spain. For this study we selected the  
106     subgroup of patients with laboratory-confirmed COVID-19 and radiologically confirmed  
107     pneumonia who received at least one dose of tocilizumab. Identification and inclusion of  
108     patients receiving tocilizumab was performed from the Pharmacy Department registry.

### 109     **Standard of care and tocilizumab administration criteria**

110     At admission, all patients were initially evaluated with chest radiography and blood tests  
111     including complete cell count, coagulation studies, biochemistry and inflammatory  
112     parameters. Treatment with lopinavir/ritonavir, azithromycin and hydroxychloroquine was  
113     initiated according to Vall d’Hebron University Hospital protocol. Tocilizumab was  
114     considered as additional treatment in patients with the following criteria: 1) respiratory  
115     failure defined as a ratio of arterial oxygen tension to fraction of inspired oxygen  
116     ( $\text{PaO}_2/\text{FiO}_2$  ratio) of  $<300$ , a ratio of arterial oxygen saturation measured by pulse  
117     oximetry to fraction of inspired oxygen ( $\text{SpO}_2/\text{FiO}_2$  ratio) of  $<315$  or  $\text{pO}_2 <60\text{mmHg}$  or  
118     oxygen saturation measured by pulse oximetry less than 90% when breathing room air or  
119     rapidly progressive clinical worsening according to treating physician and 2) interleukin-6  
120     (IL-6) levels  $>40\text{pg/mL}$  (reference 0-4.3 $\text{pg/mL}$ ) or a D-dimer levels  $> 1500 \text{ ng/mL}$   
121     (reference 0-243  $\text{pg/mL}$ ). Two dosing regimens based on weight were considered for  
122     tocilizumab. Patients over 75kg received 600mg, otherwise 400mg was the preferred dose.  
123     A second dose was considered in patients with a poor early response. Patients with liver  
124     enzymes (aspartate aminotransferase and alanine aminotransferase) 5 times over the upper

125 limit of normality or concomitant severe bacterial infection were not eligible for  
126 tocilizumab treatment.

### 127 **Data sources**

128 Data were collected retrospectively from the medical charts of patients from the 13<sup>th</sup> of  
129 March, 2020 to the 18<sup>th</sup> of March, 2020, when the protocol was submitted to the  
130 institutional review board, and prospectively thereafter. Inclusion and follow-up are still  
131 ongoing. The cut-off data for inclusion in this sub-study was the 25<sup>th</sup> of March, 2020. All  
132 patients included were followed for at least 7 days. The institutional review board provided  
133 ethical clearance (local review board code number: PR(AG)183/2020). Patients were asked  
134 for an oral consent. The institutional review board granted an informed consent waiver if  
135 patients were unable to give oral consent. Written consent was waived because of the crisis  
136 context and concerns about safety when introducing a physical support for the consent in  
137 the isolation areas.

138 A Laboratory-confirmed case was defined as a patient with a real-time reverse-  
139 transcriptase-polymerase-chain-reaction (RT-PCR) SARS-CoV-2 positive result in any  
140 respiratory sample (nasopharyngeal swab, sputum, bronchoalveolar lavage or aspirate,  
141 tracheal aspirate).

142 We collected sociodemographic characteristics, past medical history, Charlson comorbidity  
143 score, concomitant medication, current therapy, adverse drug events, blood test results,  
144 imaging studies, microbiological tests other than SARS-CoV-2 RT-PCR on respiratory  
145 samples when available, and supportive measures needed. Vital signs, symptoms and  
146 physical examination were evaluated on admission, at 48h and weekly during hospital  
147 admission. Laboratory, microbiology and imaging studies were performed on admission  
148 and thereafter according to the clinical care needs of each patient. Laboratory assessments

149 consisted of a complete blood count, coagulation testing including D-dimer measurement,  
150 liver and renal tests, electrolyte profile, and inflammatory profile including C-reactive  
151 protein, fibrinogen, ferritin and IL-6. All radiographs were reviewed by the investigators  
152 and computed tomography (CT) scans were recorded according to the radiology department  
153 reports. The COVID-19 severity was measured with the CURB-65 scale for community  
154 acquired pneumonia and other scales.<sup>19,20</sup> Data was recorded in the Research Electronic  
155 Data Capture software (REDCap, Vanderbilt University).

### 156 **Laboratory confirmation**

157 From the onset of the outbreak until 15<sup>th</sup> of March the microbiological diagnosis was based  
158 on a homebrew RT-PCR assay targeting two viral targets (N1 and N2) in the viral  
159 nucleocapsid (N) gene and one in the envelope (E) gene of SARS-CoV-2, as well as the  
160 human RNase P (RP) gene as an internal control of the whole process, according to the  
161 CDC and ECDC Real-Time RT-PCR Diagnostic Panels with minor modifications.<sup>21</sup> Since  
162 March 15<sup>th</sup>, commercial Allplex™ 2019-nCoV multiplex RT-PCR (Seegene, South Korea)  
163 were used for the detection of three viral targets (E; N; and, RNA-dependent RNA  
164 polymerase, RdRp) and an internal control. First SARS-CoV-2 laboratory-confirmations  
165 were confirmed by RdRp sequencing.<sup>22,23</sup> Total nucleic acids (DNA/RNA) were extracted  
166 from respiratory specimens using NucliSENS easyMAG (BioMerieux, France)  
167 and STARMag Universal Cartridge Kit (Seegene, South Korea) according to the  
168 manufacturer's instructions. All microbiological procedures were carried out in the  
169 laboratory under Biosafety Level 2 conditions.

### 170 **Study outcomes**



171 The primary simple endpoint was defined as death at 7 days after first dose of tocilizumab.  
172 Secondary outcomes were admission to Intensive Care Unit (ICU), acute Respiratory  
173 Distress Syndrome (ARDS) and respiratory insufficiency. We also assessed acute  
174 myocardial infarction, septic shock, acute kidney injury and secondary infections. Berlin  
175 criteria for the ARDS were adapted, as many of the patients did not have an available  
176 arterial O<sub>2</sub> pressure due to the overwhelming volume of admitted patients that precluded us  
177 from performing arterial blood samples on all patients. Instead, we used oxygen saturation  
178 by pulse oximetry and its correlation to the inspired fraction of oxygen (SpO<sub>2</sub>/FiO<sub>2</sub> ratio <  
179 315).<sup>24,25</sup> One patient died a few hours after receiving tocilizumab and was excluded from  
180 the primary endpoint analysis.

### 181 **Statistical analysis**

182 Continuous variables were expressed as mean and standard deviation or medians and  
183 interquartile range, as appropriate. Categorical variables were summarized as absolute  
184 number and percentages. Comparisons among groups was performed with Chi squared test  
185 and Fisher's test for categorical variables; and Student's T test and Mann-Whitney U test  
186 for continuous variables. Box plots and bar plots are also provided for some associations.  
187 Mortality in the cohort was described with the use of Kaplan-Meier analysis. Tests were  
188 considered significant when the two-tailed p-value was <0.05. We did not correct for  
189 multiple comparisons; hence, the widths of the confidence intervals should not be  
190 interpreted as definitive for the associations with the outcomes. Association between time  
191 to tocilizumab administration and mortality were assessed by means of Cox proportional  
192 hazards regression. Missing urea and bilirubin levels on admission were assumed normal  
193 for CURB-65 and SOFA calculation; no other imputation was made for missing data.  
194 Analysis was performed with Stata 15.1 software (StataCorp).

195

196 **Study oversight**

197 The study was designed and conducted by the investigators from the Vall d'Hebron  
198 COVID-19 Prospective Cohort Study. No specific funding was provided to conduct the  
199 study. Data were collected, debugged, analysed and interpreted by the authors. All the  
200 authors reviewed the manuscript and vouch for the accuracy and completeness of the data  
201 and for the adherence of the study to the protocol.

202

203 **RESULTS:**

204 **Demographic and clinical characteristics**

205 Since the onset of the COVID-19 outbreak until March 25<sup>th</sup>, 3242 respiratory-derived  
206 samples have been requested from our institution for COVID-19 diagnosis. Samples were  
207 requested from the emergency room and hospital wards, as well as from the health care  
208 worker surveillance strategy plan. From them, 941 were positive (29%). During this period,  
209 82 SARS-CoV-2 infected patients received at least one dose of tocilizumab. The mean  
210 ( $\pm$ SD) age was 59.1 ( $\pm$ 19.8) years (95% Confidence Interval 54.8-63.5). Fifty-two patients  
211 were male (63.5%). Eighteen (21.9%) patients were born abroad, 13 (16.1%) in Latin  
212 America, 3 (3.7%) in Eastern Europe and 2 (2.4%) in North Africa. The mean ( $\pm$ SD)  
213 duration of symptoms before hospital admission was 6.7 ( $\pm$ 4.4) days. Fever and cough were  
214 the main symptoms on admission, occurring in 75 (91.5%) and 71 (86.6%) cases  
215 respectively.

216 Thirty-three (40.3%) patients were former or active tobacco smokers. Coexisting conditions  
217 were as follows: 32 (39.0%) had hypertension, 19 (23.5%) had lung diseases (2 (2.4%)  
218 asthma, 6 (7.3%) chronic obstructive pulmonary disease among others), 17 (20.7%) had  
219 obesity, 16 (19.5%) had diabetes mellitus, 11 (13.6%) had chronic kidney disease, 5 (6.1%)  
220 a history of cardiac failure, 1 (1.2%) had cirrhosis. Ten (12.5%) patients were  
221 immunosuppressed because of different conditions. Seventy-seven (95.1%) patients had a  
222 Barthel scale index of 100 points previous to hospital admission. Table 1 shows  
223 demographic and clinical characteristics at baseline.

224 **Laboratory and Radiologic findings**

225 On admission, mean ( $\pm$ SD) white cell count was 9.2 (10.4) with 17 (21.3%) patients having  
226 more than 10000 per cubic millilitre white cells. Lymphocytopenia (<1000 cells per cubic

227 millilitre) was present in 46 (57.5%) patients. Interleukin-6 median (IQR) plasma level on  
228 admission was 74.8 (49.4-120.0) ng/ml. Liver enzymes were below five times the upper  
229 normal value in all patients. Pneumonia was radiologically proven in all patients on  
230 admission or during follow up. Tables 2 and 3 describe laboratory and radiologic findings  
231 on admission and during follow up.

### 232 **Microbiologic results**

233 All included patients had a positive RT-PCR for SARS-CoV-2 in a respiratory-derived  
234 sample. On admission, 2 patients out of 56 had a positive pneumococcal urinary antigen  
235 result. Sputum samples from 13 patients were sent on admission, bacterial growth was  
236 demonstrated in 3 samples, two with *Haemophilus influenzae* that were considered  
237 clinically significant and one was deemed contamination with oral bacteria. During the first  
238 7 days follow up, 2 more positive results were retrieved: one Extended-Spectrum Beta-  
239 Lactamase (ESBL)-producing *Escherichia coli* (considered clinically significant) and one  
240 *Staphylococcus epidermidis* (considered non-clinically significant). Blood cultures from 65  
241 patients were sent, and one positive bacterial growth (coagulase-negative *Staphylococcus*)  
242 was observed, although considered a contamination. Detailed microbiologic data are shown  
243 in Table 3.

### 244 **Oxygen supplementation and secondary outcomes.**

245 Table 4 shows oxygen saturation, oxygen supplementation and ventilation support. On  
246 admission, mean FiO<sub>2</sub> oxygen supplementation was 0.36 ( $\pm$ 0.26) and mean oxygen  
247 saturation was 94% ( $\pm$ 4.39). Regarding oxygen supplementation devices on admission, 34  
248 (41.5%) patients were on oxygen supplementation: two (5.8%) patients were on nasal  
249 cannulas, 22 (64.7%) were using face masks, 9 (26.5%) patients were using high oxygen  
250 supplementation devices and 1 (2.9%) patient required endotracheal intubation with

251 mechanical ventilation. Over time, SpO<sub>2</sub>/FiO<sub>2</sub> ratio deteriorated from a median (IQR) of  
252 428 (316.1-454.8) on admission, 271.4 (158.3-361.5) at 48 hours and 230.2 (118.8-346.4)  
253 at 7 days follow up (p<0.001). Fifty-five (69.6%) patients required intensive oxygen  
254 therapy, including high flow oxygen delivery systems, high flow nasal cannula, non-  
255 invasive mechanical ventilation or invasive ventilation during the study period. Median  
256 (IQR) days on high flow oxygen delivery systems, high flow nasal cannula, non-invasive  
257 mechanical ventilation or invasive ventilation before progression to other intensive oxygen  
258 therapy, outcome attainment or data censoring were 2.0 (1.0-3.0), 4.0 (2.0-6.0), 3.0 (2.0-  
259 4.0) and 9.0 (9.0-9.0) respectively. The median (IQR) days from admission to first intensive  
260 oxygen therapy was 2.0 (1.0-4.5). Only one (1.2%) patient required vasopressor therapy  
261 due to hypotension. No patient required renal replacement therapy. Respiratory failure and  
262 ARDS developed in 62 (75.6%) and 45 (54.9%) patients, respectively. Median (IQR) days  
263 from symptoms to respiratory failure and ARDS were 8 (6.0-11.0) and 8 (5.0-11.0)  
264 respectively. Median (IQR) days from admission to respiratory failure and ARDS were 1  
265 (0.0-3.0) and 2 (1.0-4.0) respectively. Secondary outcomes can be found in Table 5.

#### 266 **Tocilizumab treatment and concomitant treatment**

267 Eighty-one (98.9%) patients received hydroxychloroquine, 63 (76.8%) lopinavir/ritonavir,  
268 21 (25.61%) darunavir/cobicistat, and 79 (96.34%) azithromycin. All patients were initially  
269 treated with antibiotic therapy, mainly ceftriaxone (77 (93.9%) patients). As expressed  
270 before, all patients received at least one dose of tocilizumab. Median (IQR) time in days  
271 from symptom onset to tocilizumab administration was 9.0 (6.0-11.0) and from admission  
272 to tocilizumab administration was 2.0 (1.0-3.0)). Other treatments include cytokine  
273 hemoadsorption therapy in 2 (2.4%) patients in ICU.

#### 274 **Primary outcome and mortality risk factors**

275 Table 6 summarizes primary outcome in the study population. At the end of the follow up  
276 period, of the 82 patients 34 (41.5%) had been discharged, 22 (26.8%) had died, 14 (17.1%)  
277 were hospitalized in ICU, 9 (11.0%) were hospitalized in medical wards, and 3 (3.7%) had  
278 been transferred to another institution. In the univariate analysis age, age-adjusted Charlson  
279 comorbidity index, medical history of active or former solid cancer, hypertension, history  
280 of heart failure, chronic kidney disease and worse age-adjusted Charlson index at baseline  
281 were associated with increased risk of mortality (Table 7). By 7-day follow-up, the  
282 mortality rate was 4.0% per person-day (95% confidence interval [CI], 2.4% to 6.2%) by  
283 Kaplan-Meier analysis. Mortality was more frequent in patients receiving tocilizumab once  
284 ARDS was present (hazard ratio for mortality 3.3; 95% CI, 1.3 to 8.5; age-adjusted hazard  
285 ratio for mortality 2.1; 95% CI, 0.8 to 5.8)(Figure 1) or respiratory failure was present  
286 (hazard ratio for mortality 3.13; 95% CI, 1.3 to 7.8; age-adjusted hazard ratio for mortality  
287 2.4; 95% CI, 0.9 to 6.4)(Figure 2). When dividing patients according to the nearest  
288 SpO<sub>2</sub>/FiO<sub>2</sub> ratio to tocilizumab administration, mortality was higher among patients with  
289 lower SpO<sub>2</sub>/FiO<sub>2</sub> ratio (SpO<sub>2</sub>/FiO<sub>2</sub> ratio<200, 46.2%; SpO<sub>2</sub>/FiO<sub>2</sub> ratio 200-300, 16.7%;  
290 SpO<sub>2</sub>/FiO<sub>2</sub> ratio >300, 20.6%; p=0.03)(Figure 3). Distribution of the nearest SpO<sub>2</sub>/FiO<sub>2</sub>  
291 ratio to tocilizumab administration depending on outcome groups was not statistically  
292 significant (mean (SD) SpO<sub>2</sub>/FiO<sub>2</sub> ratio: 321.3 (154.7) dead, 343.1 (132.7) ICU, 396.9  
293 (96.2) alive; p=0.2)(Figure 4). No correlation was observed between nearest IL-6 levels to  
294 tocilizumab administration and main outcome (median (IQR) IL-6 levels: 79.7 (48.2-128.1)  
295 dead, 77.5 (55-120) ICU admission, 71.4 (49.4-116) alive; p=0.92). Basal characteristics of  
296 patients stratified by ARDS and respiratory failure can be found in the Supplementary  
297 Appendix.

## 298 **Safety**

299  
300 Twelve (14.63%) out of 82 patients reported a total of 14 adverse events during the follow  
301 up. Thirteen (92.9%) adverse events were considered related to lopinavir/ritonavir, 9  
302 (75.0%) patients discontinued lopinavir/ritonavir treatment due to gastrointestinal  
303 symptoms. Diarrhoea was the most common reported adverse event. Other adverse events  
304 included nausea and dysuria. There were no adverse events attributed to tocilizumab. No  
305 serious adverse events were reported during follow up, and only 2 (14.3%) were considered  
306 moderate. Eleven (91.7%) patients recovered without medical sequelae and one patient had  
307 an unknown outcome. No tocilizumab discontinuation was reported due to adverse events.  
308

309 **DISCUSSION**

310 This preliminary report from the Vall d'Hebron COVID-19 Prospective Cohort Study  
311 describes the characteristics and clinical outcomes of patients who were hospitalized in  
312 non-ICU wards and received treatment with tocilizumab. Our results show that a timely  
313 administration of immune-modulating therapies, before the onset of respiratory  
314 insufficiency or ARDS, may improve severe COVID-19 patients' outcomes.  
315 Therapies to improve outcomes of patients with COVID-19 focus on viral-directed  
316 therapies and host-directed therapies. There is still lack of evidence about the efficacy of  
317 any of these therapies, although this does not prevent physicians to use all sorts of off-label  
318 therapies despite the risk of serious adverse events.<sup>26</sup> Therapies to curb uncontrolled  
319 cytokine release have been proposed and are being widely used. Randomized controlled  
320 trials with host-directed therapies are currently under way and results will be available  
321 within the next months.<sup>17,18</sup> Meanwhile, data from prospective studies can help to improve  
322 COVID-19 patient management. In our study, the 7-day mortality was 26.8%, slightly  
323 higher than a recent experience with remdesivir and similar to the mortality of 22.1%  
324 reported in another study with lopinavir/ritonavir.<sup>27,28</sup> However, the patients in our  
325 prospective cohort had more coexisting conditions, including potential mortality risk  
326 factors such as hypertension, other cardiovascular and metabolic diseases, chronic kidney  
327 disease and cancer.

328 The understanding of mortality risk factors in patients with COVID-19 is an evolving  
329 matter. Age, specific coexisting conditions and laboratory parameters may help identify  
330 patients with poor outcome.<sup>29</sup> As expressed before, in our cohort of patients treated with  
331 tocilizumab, hypertension, history of cardiac failure and chronic kidney disease were  
332 associated with higher mortality in the univariate analysis. Antihypertensive agents, such as



333 angiotensin-converting enzyme inhibitors (ACEI) and angiotensin receptor blockers  
334 (ARB), have been suggested to be associated with the increased mortality observed in this  
335 subset of patients. Angiotensin converting enzyme 2 plays an important role in SARS-CoV-  
336 2 viral entry as co-receptor.<sup>30</sup> Hypothesis outline that the interactions between these drugs  
337 and co-receptors may increase viral spreading in the lung and increase risk of death.  
338 However, the evidence is limited and no specific recommendations could be drawn from  
339 current evidence, especially when ACEI and ARB have shown to reduce mortality in this at  
340 risk population.<sup>31</sup> The Vall d'Hebron COVID-19 Prospective Cohort Study has among its  
341 main objectives to analyse the role of these and other drugs used to treat chronic conditions  
342 in the prognosis of patients with COVID-19.

343 Host-directed therapies aiming at blocking an unrestrained immune response and an  
344 excessive inflammation have been proposed as potential therapies to prevent acute lung  
345 injury and subsequent ARDS. SARS-CoV-2 infection severity has been associated with an  
346 increase in IL-6 and D dimer levels, and the cytokine profile resembles that of other  
347 conditions in which host-directed therapies have been successfully used.<sup>13,29,32</sup> Timely use  
348 of host-directed therapies may curb uncontrolled cytokine release and prevent damage  
349 inflicted by hyperinflammation. Tocilizumab has shown to be safe in two small Chinese  
350 cohort studies of patients with COVID-19.<sup>9,16</sup> Efficacy of tocilizumab, measured as hospital  
351 discharge, was 90.5% (19 out of 21 patients) in patients with COVID-19 needing oxygen  
352 supplementation and having elevated IL-6 in one study<sup>9</sup>; while the other study showed 3  
353 deaths, 10 clinical stabilizations and 2 clinical aggravations out of 15 patients.<sup>16</sup> Other  
354 laboratory and radiologic findings also improved in a short period of time. However,  
355 standard of care in the studies was different limiting the possibility of direct comparisons.  
356 As in other infections and inflammation-driven diseases, timely initiation of precise therapy

357 is the mainstay of patient management and directly affects mortality and morbidity. Our  
358 study showed that patients receiving prompt treatment with tocilizumab before lung injury  
359 is established have less 7-day mortality, a benefit that may be sustained in the long-term.<sup>33</sup>  
360 The safety profile of tocilizumab has been extensively studied in clinical trials with patients  
361 suffering autoimmune diseases. The most common adverse events of intravenous  
362 tocilizumab in a pooled analysis of 3 clinical trials were upper respiratory infections,  
363 nasopharyngitis, headache, hypertension and increase in liver enzymes. Serious adverse  
364 events occurred in 12% of the patients, infectious diseases being the most common.<sup>34</sup> In our  
365 study we did not report any serious adverse events, although the symptoms of systemic  
366 viral infections may mimic any adverse event and make its identification difficult.  
367 Tocilizumab-related bacterial infections were not reported in our study. Two factors may  
368 have contributed to this: first, many patients were under antibiotic treatment, and second,  
369 the short follow up period precludes us from any further analysis. Nevertheless, the low  
370 cumulative dose administered in this subset of patients may diminish the likelihood of  
371 infectious adverse events.  
372 In a time of scarce medical resources, including limited stock of host-directed therapies,  
373 hard medical decisions have to be done by front-line physicians. Allocation of therapies to  
374 patients with the highest chances of a favourable outcome should be encouraged,  
375 maximizing the benefit of the intervention.<sup>35</sup> Evidence-based decision-making and benefit-  
376 maximizing allocation of the available resources should be promoted. In this regard our  
377 study can help physicians to better allocate host-directed therapy in patients with COVID-  
378 19 prioritizing moderate-to-severe ill patients over critically ill patients.  
379 This preliminary exploratory study has several limitations. First, there is no control group  
380 and the minimum follow up period was 7 days. Therefore, at this point it is not possible to

381 evaluate the differences between patients receiving tocilizumab or not and, consequently, it  
382 is not possible to evaluate solidly what is the overall benefit of administering this drug.  
383 However, the urgency of obtaining data on new therapies justifies the early communication  
384 of these results. Second, ICU admission is not a very robust endpoint since it depends on  
385 the attitudes of the treating physicians as well as the availability of beds at times of resource  
386 scarcity and overwhelming demand. For this reason, mortality was selected as the main  
387 outcome in our study. Besides, the subsequent analysis of all patients included in the Vall  
388 d'Hebron COVID-19 Prospective Cohort Study may solve this limitation and inform results  
389 with a longer follow up period. Finally, our data is limited to a single centre. While our  
390 results may not be extrapolated to other populations or other standards of care, the  
391 management of patients was homogeneous avoiding the centre effect of multicentric  
392 studies. Multivariate analysis is limited by sample size.

393 **CONCLUSION**

394 In summary, we found a mortality rate of 26.8% in this subset of patients with COVID-19  
395 receiving tocilizumab for the treatment of inflammatory-related lung injury. Time from  
396 lung injury onset to tocilizumab administration may be critical to patient recovery. Our  
397 results may help front-line physician to make evidence-based decisions in times of scarce  
398 resources and operationalized fair and transparent allocation procedures, maximizing the  
399 benefit of the intervention. Future and current host-directed clinical trials for patients with  
400 COVID-19 should consider our preliminary data in their design. All our patients were  
401 treated with a combination of antiviral drugs whose efficacy is yet to be demonstrated.  
402 Host-directed therapies in the absence of antiviral drugs needs further investigation.

403 **ACKNOWLEDGEMENT**

404 None

405 **CONFLICTS OF INTEREST**

406 None

407

408 **CONTRIBUTION STATEMENT:**

- 409 • Conceived the idea: ASM, JEP, JSN, NFH, BA
- 410 • Reviewed medical chart and collected data. ASM, JSM, JEP, NFH, FS, XD, MM, AA,  
411 SEE, ASG, AMP, PBM, SA, JS, AGdC.
- 412 • Supervised the findings: ASM, JEP, JSN, NFH, BA
- 413 • Performed statistical analysis: ASM, JEP, NFH, SPH
- 414 • Wrote the manuscript with inputs from all authors: ASM, JEP, NFH
- 415 • Supervised the project: ASM, JS, BA
- 416 • Interpretation of the results: ASM, JSM, JEP, NFH, FS, XD, MM, AA, SEE, ASG, AMP,  
417 PBM, SA, JS, AGdC.
- 418 • Critically reviewed the manuscript: ASM, JSM, JEP, NFH, FS, XD, MM, AA, SEE, ASG,  
419 AMP, PBM, SA, JS, AGdC.
- 420

421 **REFERENCES**

- 422 1. Huang C, Wang Y, Li X, et al. Clinical features of patients infected with 2019 novel  
423 coronavirus in Wuhan, China. *Lancet Lond Engl* 2020;395(10223):497–506.
- 424 2. Novel Coronavirus (2019-nCoV) situation reports [Internet]. [cited 2020 Apr  
425 1]; Available from: [https://www.who.int/emergencies/diseases/novel-coronavirus-](https://www.who.int/emergencies/diseases/novel-coronavirus-2019/situation-reports)  
426 [2019/situation-reports](https://www.who.int/emergencies/diseases/novel-coronavirus-2019/situation-reports)
- 427 3. Novel Coronavirus Pneumonia Emergency Response Epidemiology Team. [The  
428 epidemiological characteristics of an outbreak of 2019 novel coronavirus diseases  
429 (COVID-19) in China]. *Zhonghua Liu Xing Bing Xue Za Zhi Zhonghua*  
430 *Liuxingbingxue Zazhi* 2020;41(2):145–51.
- 431 4. Hauser A, Counotte MJ, Margossian CC, et al. Estimation of SARS-CoV-2 mortality  
432 during the early stages of an epidemic: a modelling study in Hubei, China and  
433 northern Italy. *medRxiv* 2020;2020.03.04.20031104.
- 434 5. De Clercq E. Potential antivirals and antiviral strategies against SARS coronavirus  
435 infections. *Expert Rev Anti Infect Ther* 2006;4(2):291–302.
- 436 6. Al-Tawfiq JA, Memish ZA. Update on therapeutic options for Middle East  
437 Respiratory Syndrome Coronavirus (MERS-CoV). *Expert Rev Anti Infect Ther*  
438 2017;15(3):269–75.
- 439 7. Gautret P, Lagier J-C, Parola P, et al. Hydroxychloroquine and azithromycin as a  
440 treatment of COVID-19: results of an open-label non-randomized clinical trial. *Int J*  
441 *Antimicrob Agents* 2020;105949.
- 442 8. Chen Z, Hu J, Zhang Z, et al. Efficacy of hydroxychloroquine in patients with  
443 COVID-19: results of a randomized clinical trial. *medRxiv*  
444 2020;2020.03.22.20040758.
- 445 9. Xu X, Han M, Li T, et al. Effective treatment of severe COVID-19 patients with  
446 tocilizumab. Available from: [chinaXiv:202003.00026v1](http://chinaXiv:202003.00026v1) (2020).  
447 [www.chinaxiv.org/abs/202003.00026](http://www.chinaxiv.org/abs/202003.00026)
- 448 10. Tang N, Bai H, Chen X, Gong J, Li D, Sun Z. Anticoagulant treatment is associated  
449 with decreased mortality in severe coronavirus disease 2019 patients with  
450 coagulopathy. *J Thromb Haemost JTH* 2020;
- 451 11. Richardson P, Griffin I, Tucker C, et al. Baricitinib as potential treatment for 2019-  
452 nCoV acute respiratory disease. *Lancet Lond Engl* 2020;395(10223):e30–1.
- 453 12. Mehta P, McAuley DF, Brown M, Sanchez E, Tattersall RS, Manson JJ. COVID-19:  
454 consider cytokine storm syndromes and immunosuppression. *The Lancet*  
455 2020;395(10229):1033–4.

- 456 13. Zumla A, Hui DS, Azhar EI, Memish ZA, Maeurer M. Reducing mortality from 2019-  
457 nCoV: host-directed therapies should be an option. *Lancet Lond Engl*  
458 2020;395(10224):e35–6.
- 459 14. Biggioggero M, Crotti C, Becciolini A, Favalli EG. Tocilizumab in the treatment of  
460 rheumatoid arthritis: an evidence-based review and patient selection. *Drug Des Devel*  
461 *Ther* 2019;13:57–70.
- 462 15. Brudno JN, Kochenderfer JN. Toxicities of chimeric antigen receptor T cells:  
463 recognition and management. *Blood* 2016;127(26):3321–30.
- 464 16. Luo P, Liu Y, Qiu L, Liu X, Liu D, Li J. Tocilizumab treatment in COVID-19: a  
465 single center experience. *J Med Virol* 2020;
- 466 17. Evaluation of the Efficacy and Safety of Sarilumab in Hospitalized Patients With  
467 COVID-19 - Full Text View - ClinicalTrials.gov [Internet]. [cited 2020 Apr  
468 11]; Available from: <https://clinicaltrials.gov/ct2/show/NCT04315298>
- 469 18. Study of the Efficacy and Safety of Ruxolitinib to Treat COVID-19 Pneumonia - Full  
470 Text View - ClinicalTrials.gov [Internet]. [cited 2020 Apr 11]; Available from:  
471 <https://clinicaltrials.gov/ct2/show/NCT04331665>
- 472 19. Lim WS, van der Eerden MM, Laing R, et al. Defining community acquired  
473 pneumonia severity on presentation to hospital: an international derivation and  
474 validation study. *Thorax* 2003;58(5):377–82.
- 475 20. Seymour CW, Liu VX, Iwashyna TJ, et al. Assessment of Clinical Criteria for Sepsis.  
476 *JAMA* 2016;315(8):762–74.
- 477 21. World Health Organization. Laboratory testing for 2019 novel coronavirus (2019-  
478 nCoV) in suspected human cases. *WHO - Interim Guid* 2020;2019(January):1–7.
- 479 22. Moës E, Vijgen L, Keyaerts E, et al. A novel pancoronavirus RT-PCR assay: frequent  
480 detection of human coronavirus NL63 in children hospitalized with respiratory tract  
481 infections in Belgium. *BMC Infect Dis* 2005;5:6.
- 482 23. Woo PCY, Lau SKP, Lam CSF, et al. Discovery of a novel bottlenose dolphin  
483 coronavirus reveals a distinct species of marine mammal coronavirus in  
484 *Gammacoronavirus*. *J Virol* 2014;88(2):1318–31.
- 485 24. Force TADT. Acute Respiratory Distress Syndrome: The Berlin Definition. *JAMA*  
486 2012;307(23):2526–33.
- 487 25. Festic E, Bansal V, Kor DJ, Gajic O. SpO<sub>2</sub>/FiO<sub>2</sub> Ratio on Hospital Admission Is an  
488 Indicator of Early Acute Respiratory Distress Syndrome Development Among  
489 Patients at Risk. *J Intensive Care Med* 2013;30(4):209–16.



- 490 26. Kalil AC. Treating COVID-19-Off-Label Drug Use, Compassionate Use, and  
491 Randomized Clinical Trials During Pandemics. JAMA 2020;
- 492 27. Grein J, Ohmagari N, Shin D, et al. Compassionate Use of Remdesivir for Patients  
493 with Severe Covid-19. N Engl J Med 2020;
- 494 28. Cao B, Wang Y, Wen D, et al. A Trial of Lopinavir-Ritonavir in Adults Hospitalized  
495 with Severe Covid-19. N Engl J Med 2020;
- 496 29. Zhou F, Yu T, Du R, et al. Clinical course and risk factors for mortality of adult  
497 inpatients with COVID-19 in Wuhan, China: a retrospective cohort study. Lancet  
498 Lond Engl 2020;395(10229):1054–62.
- 499 30. Zhou P, Yang X-L, Wang X-G, et al. A pneumonia outbreak associated with a new  
500 coronavirus of probable bat origin. Nature 2020;579(7798):270–3.
- 501 31. Patel AB, Verma A. COVID-19 and Angiotensin-Converting Enzyme Inhibitors and  
502 Angiotensin Receptor Blockers: What Is the Evidence? JAMA 2020;
- 503 32. Lee DW, Gardner R, Porter DL, et al. Current concepts in the diagnosis and  
504 management of cytokine release syndrome. Blood 2014;124(2):188–95.
- 505 33. Ngai JC, Ko FW, Ng SS, To K-W, Tong M, Hui DS. The long-term impact of severe  
506 acute respiratory syndrome on pulmonary function, exercise capacity and health  
507 status. Respirol Carlton Vic 2010;15(3):543–50.
- 508 34. Nishimoto N, Miyasaka N, Yamamoto K, Kawai S, Takeuchi T, Azuma J. Long-term  
509 safety and efficacy of tocilizumab, an anti-IL-6 receptor monoclonal antibody, in  
510 monotherapy, in patients with rheumatoid arthritis (the STREAM study): evidence of  
511 safety and efficacy in a 5-year extension study. Ann Rheum Dis 2009;68(10):1580–4.
- 512 35. Emanuel EJ, Persad G, Upshur R, et al. Fair Allocation of Scarce Medical Resources  
513 in the Time of Covid-19. N Engl J Med 2020;
- 514

515 **FIGURES**

516 Figure 1. 7-day mortality curves according to the moment patients received tocilizumab:  
517 before or after developing ARDS. ARDS: acute respiratory distress syndrome.

518 Figure 2. 7-day mortality curves according to the moment patients received tocilizumab:  
519 before or after developing respiratory insufficiency.

520 Figure 3. Outcome according to nearest SpO<sub>2</sub>/FiO<sub>2</sub> ratio to tocilizumab administration

521 Figure 4. Nearest SpO<sub>2</sub>/FiO<sub>2</sub> ratio to tocilizumab administration distribution according to  
522 7-days outcome

523

524 **TABLES**

525 **Table 1.** Demographic and clinical characteristics of the patients at baseline\*

| <b>Characteristics</b>                                           | <b>Patients (n=82)</b> |
|------------------------------------------------------------------|------------------------|
| Age, mean - yr                                                   | 59.1 ±19.8             |
| Sex – no (%)                                                     |                        |
| Male                                                             | 52 (63.4%)             |
| Female                                                           | 30 (36.6%)             |
| <b>Origin</b>                                                    |                        |
| Spain                                                            | 63 (77.8%)             |
| Latin America                                                    | 13 (16.1%)             |
| East Europe                                                      | 3 (3.7%)               |
| North Africa (Magreb)                                            | 2 (2.4%)               |
| <b>Coexisting condition – no (%)</b>                             |                        |
| Active tobacco smoker                                            | 5 (6.1%)               |
| Former tobacco smoker                                            | 28 (34.2%)             |
| Never smoke                                                      | 49 (59.8%)             |
| Active daily alcohol consumption                                 | 1 (1.2%)               |
| Former daily alcohol consumption                                 | 2 (2.4%)               |
| Never drink daily                                                | 79 (96.3%)             |
| Cognitive imparment                                              | 1 (1.2%)               |
| Diabetes Mellitus                                                | 16 (19.5%)             |
| Immunosuppression                                                | 10 (12.2%)             |
| Solid organ transplant                                           | 5 (6.1%)               |
| Drug induced immunosuppression                                   | 3 (3.7%)               |
| Bone marrow transplant                                           | 1 (1.2%)               |
| Other                                                            | 1 (1.2%)               |
| Former cancer (includes any solid cancer)                        | 9 (11.1%)              |
| Active cancer (includes any solid cancer)                        | 2 (2.4%)               |
| Former haematological condition (includes leukemia and lymphoma) | 3 (3.7%)               |
| Active haematological condition (includes leukemia and lymphoma) | 2 (2.4%)               |
| Hypertension                                                     | 32 (39%)               |
| Hystory of cardiac failure                                       | 5 (6.1%)               |
| Atrial fibrillation                                              | 10 (12.2%)             |
| Lung diseases –                                                  | 19 (23.5%)             |
| Chronic obstructive pulmonary disease                            | 6 (7.3%)               |
| Obstructive sleep apnea syndrome                                 | 3 (3.7%)               |
| Insterstitial lung disease                                       | 2 (2.4%)               |
| Asthma                                                           | 2 (2.4%)               |
| Bronchiectasis                                                   | 2 (2.4%)               |
| Lung restritive disease                                          | 2 (2.4%)               |
| Lung transplant                                                  | 2 (2.4%)               |
| Pulmonary hypertension                                           | 1 (2.4%)               |

|                                                                         |            |
|-------------------------------------------------------------------------|------------|
| Controlled pulmonary tuberculosis                                       | 1 (2.4%)   |
| Chronic kidney disease                                                  | 11 (13.6%) |
| GFR>50                                                                  | 3 (27.3%)  |
| GFR 30-50                                                               | 4 (36.4%)  |
| GFR<30                                                                  | 4 (36.4%)  |
| Renal supportive therapy (hemodialysis)                                 | 2 (18.2%)  |
| Cirrhosis                                                               | 1 (1.2%)   |
| Central nervous system disease                                          | 2 (2.4%)   |
| Obesity                                                                 | 17 (20.7%) |
| Mean duration of symptom before admission (days)                        | 6.7 ±4.4   |
| Mean days from symptom onset to dyspnea                                 | 1.14 ±3.6  |
| Mean duration of dyspnea before admission                               | 3.48±3.2   |
| <b>Symptoms</b>                                                         |            |
| Fever                                                                   | 75 (91.5%) |
| Cough                                                                   | 71 (86.6%) |
| Shortness of breath                                                     | 54 (65.9%) |
| Sore throat                                                             | 1 (1.2%)   |
| Sputum production                                                       | 8 (9.8%)   |
| Rhinorrhea                                                              | 1 (1.2%)   |
| Headache                                                                | 1 (1.2%)   |
| Lost of weight                                                          | 4 (4.9%)   |
| Malaise                                                                 | 46 (56.1%) |
| Hemoptysis                                                              | 5 (6.1%)   |
| Chest pain                                                              | 21 (25.6%) |
| Anosmia                                                                 | 4 (4.9%)   |
| Cacosmia                                                                | 3 (3.7%)   |
| Muscle and joint pain                                                   | 14 (17.1%) |
| Nauseas                                                                 | 3 (3.7%)   |
| Vomits                                                                  | 36 (43.9%) |
| Diarrhea                                                                | 8 (9.8%)   |
| Profuse sweating                                                        | 2 (2.4%)   |
| <b>Barthel scale 100 previous to symptoms onset †</b>                   | 77 (93.9%) |
| <b>ECOG ≤ 1 previous to symptoms onset ‡</b>                            | 78 (95.1%) |
| <b>Median (IQR), age-adjusted Charlson index at baseline - points §</b> | 3 (1-4)    |
| <b>Median (IQR), SOFA index at admission - points ¶</b>                 | 1 (0-3)    |
| <b>CURB-65 ≥ 3 §</b>                                                    | 18 (22%)   |

526 \*Plus-minus values are means (±SD). Rounding has been applied to percentages. Total may not be  
527 100 because of rounding.

528 †Barthel index total scores range from 0 to 100, with higher scores indicating a better  
529 performance of 10 basic daily self-care activities. ‡ The Eastern Cooperative Oncology Group (ECOG)  
530 performance scale range from 0 (fully active) to 4 (completely disabled). § The Charlson risk index

531 score ranges from 0 to 37 with higher scores indicating a higher risk of death. ¶ Sequential Organ  
532 Failure Assessment (SOFA) score ranges from 0 to 24 with higher ranges indicating a higher risk or  
533 morbidity; individuals with a score of 15 or more have a mortality rate of 90%. Its calculation is  
534 missing in two patients. § Community acquired pneumonia severity index assessing Confusion,  
535 Urea, Respiratory rate, Blood pressure and age over 65 years (CURB-65) ranges from 0 to 5  
536 depending on the number of risk factors present in the same patient.

537 GFR: glomerular filtration rate.

538 – One patient had interstitial lung disease and pulmonary hypertension and another patient had  
539 obstructive sleep apnea syndrome and lung restrictive disease.

**Table 2.** Status on admission and follow up\*

|                                                             | Admission (n=82) † | 48 hours (n=79) † | 7 days (n=51) † |
|-------------------------------------------------------------|--------------------|-------------------|-----------------|
| <b>Vital signs on admission – no. (%)</b>                   |                    |                   |                 |
| Systolic blood pressure, mean - mmHg                        | 128.3±18.3         | 120.8 ±17.7       | 125.0 ±19.4     |
| Diastolic blood pressure, mean - mmHg                       | 73 ±12.2           | 71.3 ±9.3         | 72.3 ±10.7      |
| Temperature, mean - °C                                      | 37.7 ±0.9          | 36.8 ±0.8         | 36.4 ±0.7       |
| Heart rate, mean - rates per minute                         | 94.3 ±17.8         | 79.7 ±12.0        | 79.0 ±14.2      |
| Respiratory rate, mean - breaths per minute                 | 23.9 ±6.3          | 21.5 ±6.0         | 22.5 ±11.5      |
| Temperature > 37.8°C                                        | 34 (42.5%)         | 9 (12.1%)         | 1 (1.6%)        |
| Heart rate > 100 beats per minute                           | 28 (65.4%)         | 3 (3.8%)          | 7 (11.5%)       |
| Respiratory rate > 20 breaths per minute                    | 39 (58.2%)         | 24 (40%)          | 23 (46.9%)      |
| Oxygen saturation, mean                                     | 94.0 ±4.4          | 94.1 ±3.9         | 93.6 ±6.9       |
| Physical examination – no. (%)                              |                    |                   |                 |
| Glasgow coma scale of 15                                    | 82 (100%)          |                   |                 |
| Abnormal lung sounds                                        |                    |                   |                 |
| Crackles                                                    | 62 (75.6%)         | 54 (67.5%)        | 39 (58.2%)      |
| Hypophonesis                                                | 9 (11%)            | 7 (8.6%)          | 5 (7.5%)        |
| Wheezing                                                    | 5 (6.1%)           | 2 (2.5%)          | 0 (0%)          |
| Rhonchus                                                    | 5 (6.1%)           | 2 (2.5%)          | 2 (3%)          |
| Imaging characteristics – no. (%)                           |                    |                   |                 |
| Type of chest radiography alteration†                       |                    |                   |                 |
| Unilateral or bilateral infiltrate                          | 20 (24.4%)         | 17 (21.3%)        | 21 (31.3%)      |
| Interstitial pattern                                        | 10 (12.2%)         | 4 (5%)            | 7 (10.5%)       |
| Pleural effusion                                            | 2 (2.4%)           | 1 (1.3%)          | 0 (0%)          |
| Atelectasis                                                 | 1 (1.2%)           | 1 (1.3%)          | 0 (0%)          |
| Extension of abnormality in chest radiography PA projection |                    |                   |                 |
| <33%                                                        | 32 (39.0%)         | 4 (5%)            | 4 (5.97%)       |
| 33-66%                                                      | 38 (46.3%)         | 6 (7.5%)          | 9 (13.43%)      |
| >66%                                                        | 10 (12.2%)         | 9 (11.25%)        | 13 (19.45%)     |

\*Plus-minus values are means ( $\pm$ SD). Rounding has been applied to percentages. Total may not be 100 because of rounding.

†Total number of patients varies among variables and follow up as mortality increases.

‡Some patients have more than one radiologic abnormality.

PA, posteroanterior.

**Table 3.** Laboratory data at admission and follow up\*

| Laboratory data – no. (%)                             | Admission (n=82) †   | 48 hours (n=79) †    | 7 days (n=51) †       |
|-------------------------------------------------------|----------------------|----------------------|-----------------------|
| Red cell count                                        |                      |                      |                       |
| Haemoglobin, mean – gr/dl                             | 13.3 ±1.6            | 12.7 ±1.6            | 12.5 ±1.5             |
| ≥ 10 gr/dl – no. (%)                                  | 78 (96.3%)           | 41 (93.2%)           | 43 (95.6%)            |
| White cell count                                      |                      |                      |                       |
| Mean (SD) – per mm <sup>3</sup>                       | 9.2 ±10.4            | 6.7 ±3.8             | 7.1 ±3.5              |
| Distribution – no. (%)                                |                      |                      |                       |
| ≥ 10000/mm <sup>3</sup>                               | 17 (21.3%)           | 5 (11.4%)            | 9 (20%)               |
| ≤4000/mm <sup>3</sup>                                 | 7 (8.8%)             | 10 (22.7%)           | 9 (20%)               |
| Lymphocyte count                                      |                      |                      |                       |
| Median (IQR) – per mm <sup>3</sup>                    | 868.9 (593.7-1205.5) | 710.5 (491.5-1154.9) | 1112.0 (575.1-1519.6) |
| Distribution – no. (%)                                |                      |                      |                       |
| ≥ 1000/mm <sup>3</sup> – no. (%)                      | 34 (42.5%)           | 15 (34.1%)           | 23 (51.1%)            |
| Platelet count, mean – per mm <sup>3</sup>            | 199 ±87.2            | 235.7 ±139.4         | 282.3 ±141.6          |
| Prothrombin time, mean - %                            | 77.9 ±23.8           |                      |                       |
| Activated partial thromboplastin time, mean - seconds | 24.6 ±9.8            |                      |                       |
| Fibrinogen, mean – gr/dl                              | 5.6 ±1.0             |                      |                       |
| D dimer, median (IQR) - ng/ml                         | 295 (201-437)        | 565 (303-772)        | 738 (273.5-2963)      |
| Glucose, mean - mg/dl                                 | 120.2 ±36.7          |                      |                       |
| Urea, median (IQR) – mg/dl                            | 43 (38-72)           |                      |                       |
| Serum creatinine, mean - mg/dl                        | 1.7 ±6.1             | 2.1 ±7.1             | 0.9 ±0.6              |
| Glomerular filtrate, mean – CKD-EPI                   | 73.5 ±23.8           | 73.1 ±26.5           | 77.25 ±19.9           |
| Sodium, mean – mmol/L                                 | 136.0 ±3.7           |                      |                       |
| Potassium, mean – mmol/L                              | 3.9 ±0.7             |                      |                       |
| Calcium, mean – mg/dl                                 | 8.9 ±0.5             |                      |                       |
| Total bilirubin, mean – mg/dl                         | 0.7 ±0.5             |                      |                       |
| Aspartate aminotransferase, mean - U/litre            | 53.1 ±34.3           | 53.7 ±35.4           | 71.4 ±46.2            |
| Aspartate aminotransferase > 40 U/litre               | 42 (53.9%)           | 25 (61%)             | 30 (66.7%)            |



|                                            |                   |                    |                      |
|--------------------------------------------|-------------------|--------------------|----------------------|
| Alanine aminotransferase, mean - U/litre   | 41.68 (34.4)      | 43.4 (31.7)        | 77.3 (71)            |
| Alanine aminotransferase > 40 U/litre      | 28 (35.4%)        | 16 (39.0%)         | 30 (66.7%)           |
| Alkaline phosphatase, mean - U/litre       | 69.80 ±21.7       |                    |                      |
| Gamma-glutamyl transferase, mean – U/litre | 93 ±58.0          |                    |                      |
| LDH, mean - UI/L                           | 446.61 ±79.5      |                    |                      |
| CRP, mean - mg/dl                          | 17.98 ±11.7       | 17.5 ±10.0         | 6.3 ±9.2             |
| Ferritin, mean - ng/ml                     | 885.69 ±500.5     | 1505.4 ±1194.6     | 1241.6 ±789.2        |
| Proteins, mean - gr/dl                     | 7.38 ±0.7         |                    |                      |
| Albumin, mean - gr/dl                      | 3.30 ±0.3         |                    |                      |
| IL-6, median (IQR) - pg/ml                 | 74.8 (49.4-120.0) | 184.1 (75.3-592.6) | 501.2 (103.7-2361.0) |
| <b>Infection analysis</b>                  |                   |                    |                      |
| Positive blood cultures                    | 1 (1.3%)          | 0 (0%)             | 1 (10%)              |
| Positive sputum cultures                   | 3 (4.3%)          | 0 (0%)             | 2 (22.2%)            |
| Positive pneumococcal urinary antigen      | 2 (2.5%)          | 0 (0%)             | 0 (0%)               |

\*Plus-minus values are means (±SD). Rounding has been applied to percentages. Total may not be 100 because of rounding.

†Total number of patients varies among variables and follow up as mortality increases.

**Table 4.** Oxygen supplementation and supportive ventilation on admission and follow up\*

|                                                                    | <b>Admission (n=82) †</b> | <b>48 hours (n=79) †</b> | <b>7 days (n=51) †</b> |
|--------------------------------------------------------------------|---------------------------|--------------------------|------------------------|
| Respiratory frequency, mean – rate per minute                      | 23.9 ±6.3                 | 21.6 ±6                  | 22.5 ±11.5             |
| Oxygen saturation, mean                                            | 94 ±4.4                   | 94 ±3.9                  | 93.6 ±6.9              |
| SpO <sub>2</sub> /FiO <sub>2</sub> ratio, median (IQR)             | 428 (316.1-454.8)         | 271.4 (158.3-361.5)      | 230.2 (118.8-346.4)    |
| <b>Oxygen supplementation and supportive ventilation – no. (%)</b> |                           |                          |                        |
| Nasal cannula                                                      | 2 (5.9%)                  | 6 (9%)                   | 4 (7.0%)               |
| Face masks                                                         | 22 (64.7%)                | 33 (49.3%)               | 16 (28.1%)             |
| High oxygen supplementation device                                 | 9 (26.5%)                 | 11 (16.4%)               | 6 (10.5%)              |
| High flow nasal cannulas                                           | 0 (0%)                    | 10 (14.9%)               | 16 (28.1%)             |
| Non-invasive mechanical ventilation                                | 0 (0%)                    | 2 (3%)                   | 3 (5.3%)               |
| Invasive mechanical ventilation                                    | 1 (2.9%)                  | 5 (7.5%)                 | 12 (21.1%)             |

\*Plus-minus values are means (±SD). Rounding has been applied to percentages. Total may not be 100 because of rounding.

†Total number of patients varies among variables and follow up as mortality increases.

SpO<sub>2</sub>/FiO<sub>2</sub> ratio: arterial oxygen saturation measured by pulse oximetry to fraction of inspired oxygen

**Table 5.** Secondary outcomes at 7-day follow up from tocilizumab administration.

| <b>Outcome – no. (%)</b>            | <b>Patients</b> |
|-------------------------------------|-----------------|
| Vasopressor therapy                 | 15 (19.7%)      |
| Acute respiratory distress syndrome | 45 (64.3%)      |
| Respiratory failure                 | 62 (84.9%)      |
| Cardiac failure                     | 1 (1.5%)        |
| Septic shock                        | 1 (1.6%)        |
| Acute kidney injury                 | 9 (13.9%)       |
| Concomitant infection               | 1 (1.5%)        |

**Table 6.** Main outcome at 7-day follow up from tocilizumab administration.

| <b>Main outcomes – no. %</b>    | <b>Patients</b> |
|---------------------------------|-----------------|
| Discharge                       | 34 (41.5%)      |
| In-patient in conventional ward | 9 (11.0%)       |
| Intensive care unit             | 14 (17.1%)      |
| Death                           | 22 (26.8%)      |
| Transferred                     | 3 (3.7%)        |

**Table 7.** Comparison of risk factors by in-hospital mortality.

| Characteristics                                                | Alive (n=60)  | Dead (n=22)   | P-value |
|----------------------------------------------------------------|---------------|---------------|---------|
| Demographics                                                   |               |               |         |
| Age, mean (SD) - yr                                            | 53.3 (19.9)   | 75.2 (6.2)    | <0.001  |
| Sex – no (%)                                                   | 36 (60.0)     | 16 (72.7)     | 0.289   |
| Coexisting condition – no (%)                                  |               |               |         |
| Tobacco use                                                    |               |               | 0.397   |
| Active tobacco smoker                                          | 5 (8.3)       | -             |         |
| Former tobacco smoker                                          | 19 (31.7)     | 9 (40.9)      |         |
| Never smoke                                                    | 36 (60.0)     | 13 (59.1)     |         |
| Alcohol use                                                    |               |               | 0.070   |
| Active daily alcohol consumption                               | 1 (1.7)       | -             |         |
| Former daily alcohol consumption                               | -             | 2 (9.1)       |         |
| Never drink daily                                              | 59 (98.3)     | 20 (90.9)     |         |
| Barthel index at admission, median (IQR)                       | 100 (100-100) | 100 (100-100) | 0.371   |
| Dementia                                                       | 1 (1.7)       | -             | 1       |
| Diabetes Mellitus                                              | 12 (20.0)     | 4 (18.2)      | 1       |
| Immunosuppression                                              | 5 (8.3)       | 5 (22.7)      | 0.123   |
| Solid tumor                                                    | 3 (5.1)       | 6 (27.3)      | 0.012   |
| Leukemia/Lymphoma                                              | 2 (3.3)       | 1 (4.6)       | 1       |
| Hypertension                                                   | 17 (28.3)     | 15 (68.2)     | 0.001   |
| Chronic heart failure                                          | 1 (1.7)       | 4 (18.2)      | 0.017   |
| Chronic lung disease                                           | 11 (18.6)     | 8 (36.4)      | 0.094   |
| Chronic renal failure                                          | 4 (6.7)       | 7 (33.3)      | 0.005   |
| Liver cirrhosis                                                | 1 (1.7)       | -             | 1       |
| Central nervous system disease                                 | 1 (1.7)       | 1 (4.6)       | 0.467   |
| Obesity                                                        | 14 (23.3)     | 3 (13.6)      | 0.539   |
| Median (IQR), age-adjusted Charlson index at baseline - points | 2 (1 – 3)     | 5 (3 – 6)     | <0.001  |
| Oxygenation previous to tocilizumab administration             |               |               |         |

|                                                                                    |                    |                    |       |
|------------------------------------------------------------------------------------|--------------------|--------------------|-------|
| Oxygen saturation (pulse oximeter) at baseline, median (IQR)                       | 95 (94 - 97.5)     | 93 (89 - 97)       | 0.061 |
| FiO2 at baseline, median (IQR)                                                     | 0.21 (0.21 - 0.28) | 0.26 (0.21 - 0.50) | 0.130 |
| SpO2/FiO2 ratio at baseline, median (IQR)                                          | 440 (343-455)      | 393 (180-452)      | 0.134 |
| High oxygen supplementation or ventilation at baseline* - no. (%)                  | -                  | 1 (4.6%)           | 0.268 |
| Oxygen saturation (pulse oximeter) at tocilizumab administration, median (IQR)     | 95 (93-97)         | 92 (89-94)         | 0.006 |
| FiO2 previous to tocilizumab administration, median (IQR)                          | 0.27 (0.21-0.40)   | 0.35 (0.21-1)      | 0.131 |
| SpO2/FiO2 ratio previous to tocilizumab administration, median (IQR)               | 354 (228-438)      | 263 (95-423.8)     | 0.072 |
| High oxygen supplementation or ventilation previous to tocilizumab administration* | 3 (5%)             | 4 (18%)            | 0.79  |
| Days from initial symptoms to tocilizumab administration, median (IQR)             | 9 (7 - 11)         | 7 (5 - 15)         | 0.372 |
| Days from admission to tocilizumab administration, median (IQR)                    | 2 (1 - 3)          | 3 (1 - 4)          | 0.064 |
| Days from respiratory insufficiency to tocilizumab administration, median (IQR)    | 0 (0 - 1)          | 1 (0 - 2)          | 0.055 |
| Days from ARDS to tocilizumab administration, median (IQR)                         | 0 (-1 - 0)         | 0 (0 - 1)          | 0.132 |

\*Plus-minus values are means ( $\pm$ SD). Rounding has been applied to percentages. Total may not be 100 because of rounding.

†Includes high flow oxygen delivery systems, high flow nasal cannula, non-invasive mechanical ventilation or invasive ventilation

ARDS: acute respiratory distress syndrome.
